# Supplementary material for: Improving heat transfer in fused deposition modeling with graphene enhances inter filament bonding
Source: Royal Society of Chemistry journal article supplement (doi:10.1039/c9py00832b), 2019-01-01
Supplement: c9py00832b1.pdf [file c9py00832b1.pdf]

## Supplemental information

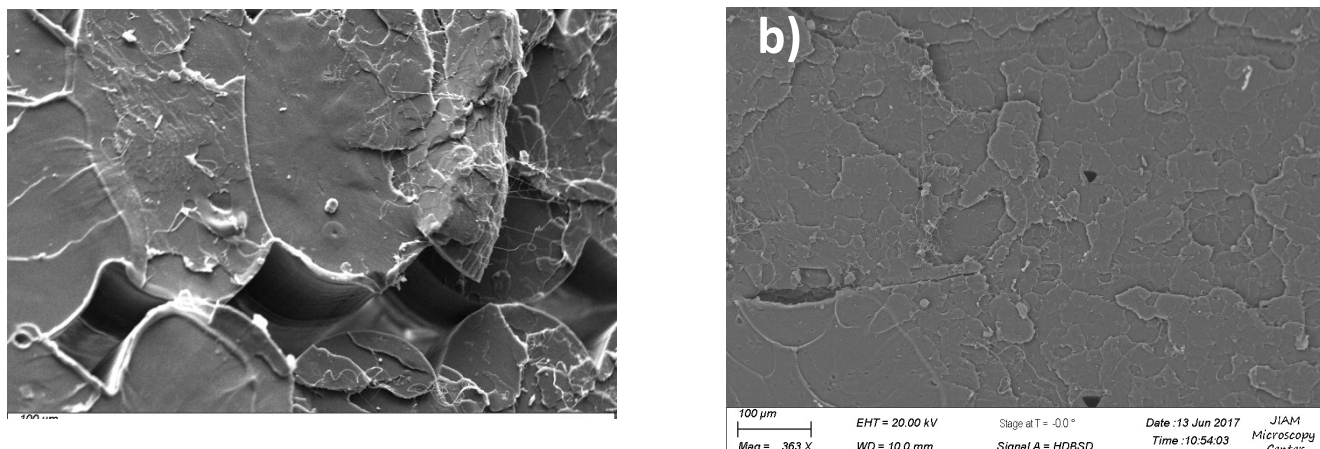

**Figure S1:** SEM images of the inter-filament voids in the XY orientation for a) PLA printed at 100°C bed temperature b) 0.5% graphene composite printed at 100 °C bed temperature

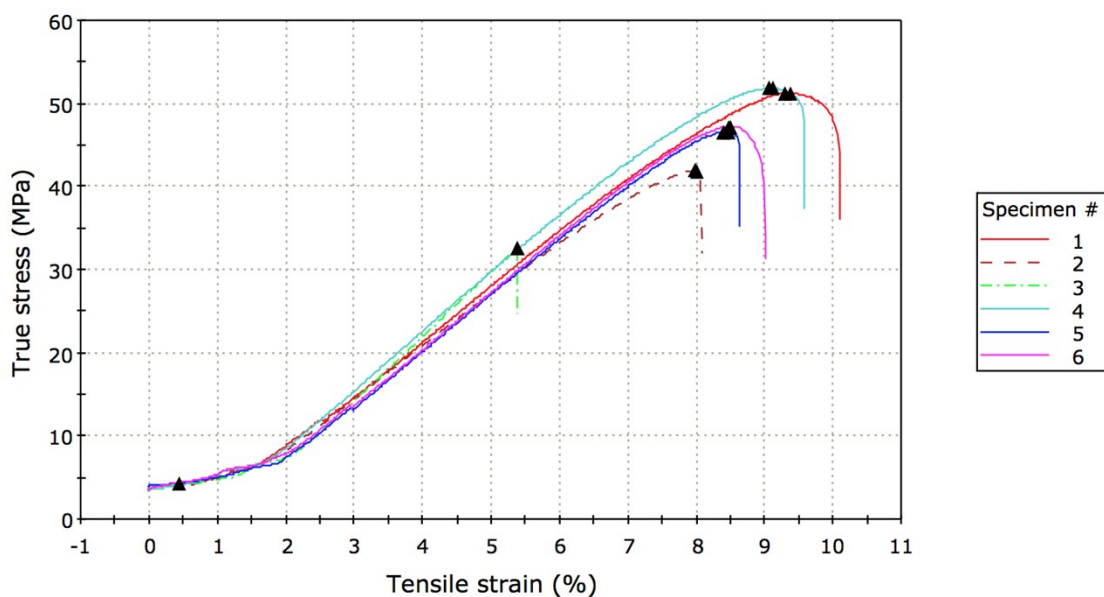

**Figure S2:** Stress vs Strain for 0.5% graphene composite for XY orientation with bed temperature of 70 °C

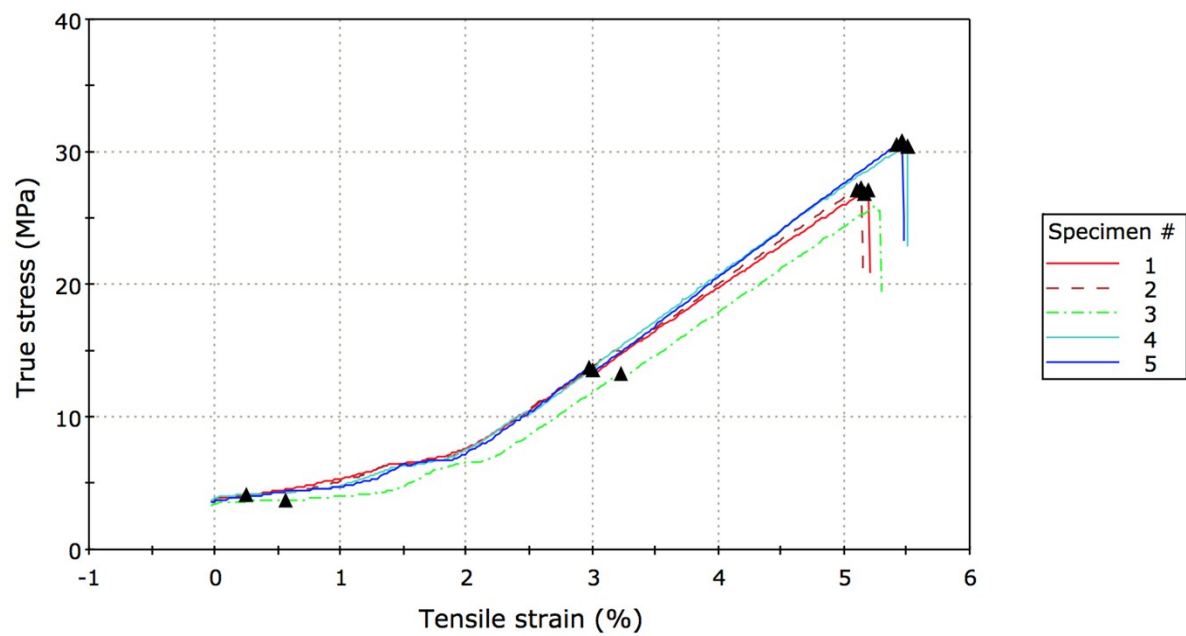

**Figure S3:** Stress vs Strain for 0.5% graphene composite for Z orientation with bed temperature of 70 °C

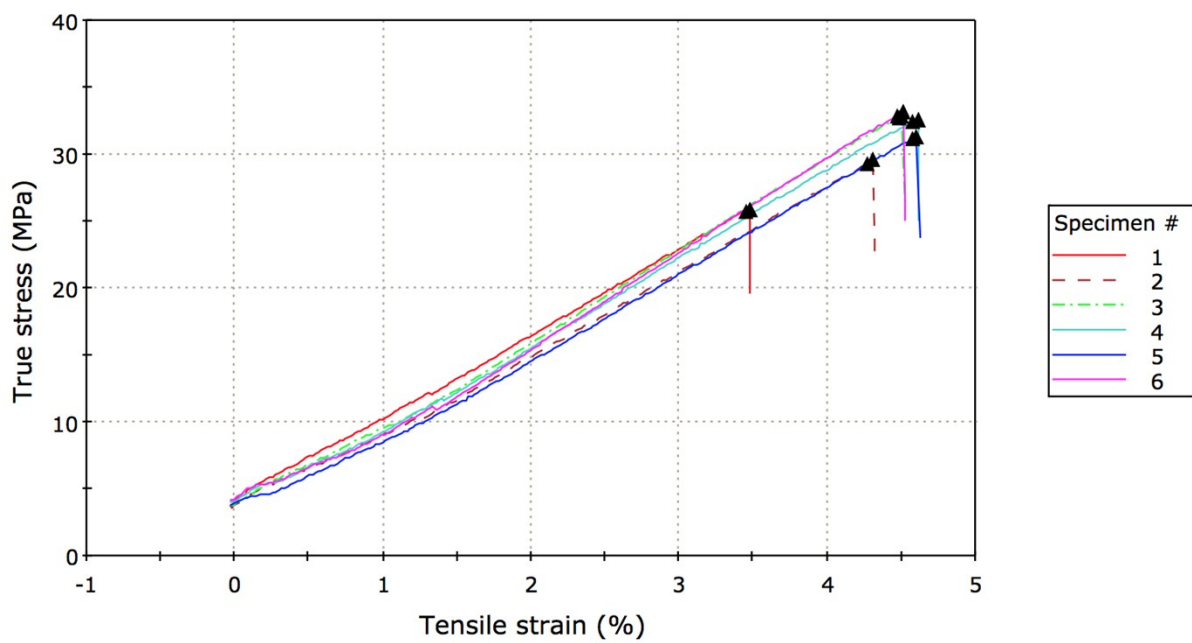

**Figure S4:** Stress vs Strain for 1 % graphene composite for XY orientation with bed temperature of 70 °C

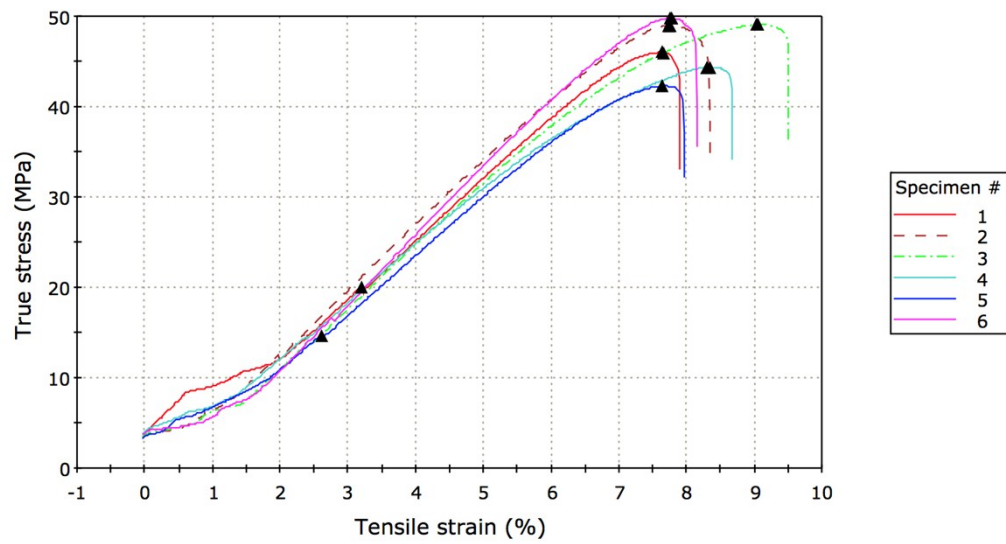

**Figure S5:** Stress vs Strain for 2% graphene composite for XY orientation with bed temperature of 70 °C

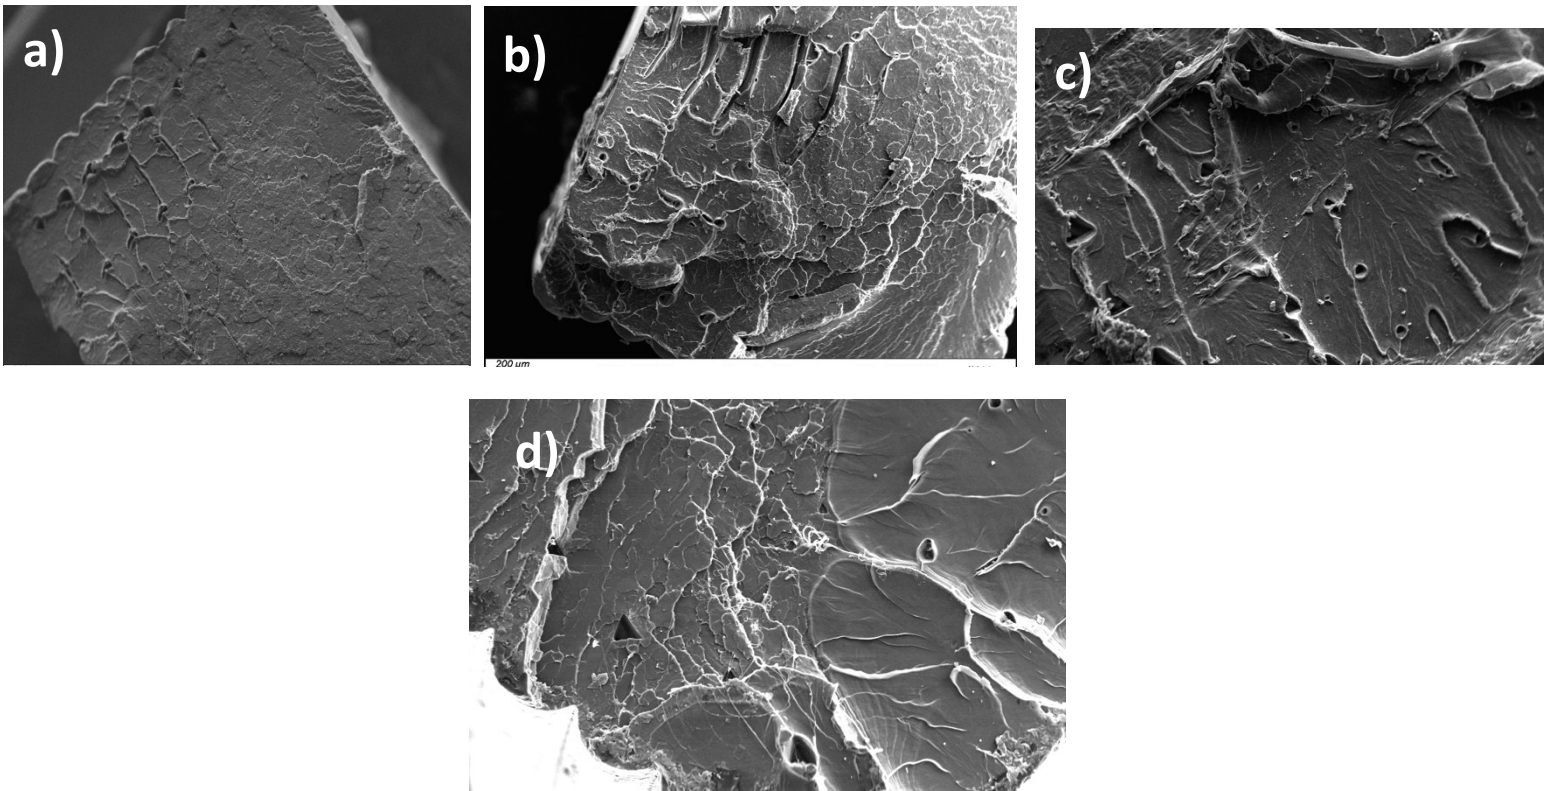

**Figure S6:** SEM images of the inter-filament voids samples printed at 85 °C. Image (a) shows the 0.5 % graphene composite while image (b) shows the 1% graphene sample and both (c) and (d) show the 2% graphene sample.
